# Supplementary material
Source: MDPI journal article supplement (https://www.mdpi.com/2673-4591/16/1/12)
Supplement: s1 [file s1 › engproc-1671039-supplementary.pdf]

## Supplementary Materials

**Table S1.** Detailed list of all patent documents of cellulose-based biosensors between 2010 and 2020.

| No | Jurisdiction | Publication Date | Application Number | Application Date | Title                                                                                                                                     | Document Type      |
|----|--------------|------------------|--------------------|------------------|-------------------------------------------------------------------------------------------------------------------------------------------|--------------------|
| 1  | US           | 2010-08-26       | US 71088510 A      | 2010-02-23       | Methods, apparatus and systems for concentration, separation and removal of particles at/from the surface of drops                        | Patent Application |
| 2  | CN           | 2010-10-13       | CN 201010177437 A  | 2010-05-13       | Cellulose ether grafted and modified temperature-sensitive hydrogel and preparation method thereof                                        | Patent Application |
| 3  | WO           | 2010-10-28       | US 2010/0032329 W  | 2010-04-24       | Functionalized polymer biosensor                                                                                                          | Patent Application |
| 4  | US           | 2010-11-04       | US 77070410 A      | 2010-04-29       | Systems, Devices, and/or Methods Regarding Specific Precursors or Tube Control Agent for the Synthesis of Carbon Nanofiber and Nanotube   | Patent Application |
| 5  | US           | 2010-11-18       | US 66015610 A      | 2010-02-19       | Systems, devices, and methods including infection-fighting and monitoring shunts                                                          | Patent Application |
| 6  | WO           | 2011-05-05       | GB 2010051808 W    | 2010-10-28       | Micro-channel structure method and apparatus                                                                                              | Patent Application |
| 7  | US           | 2011-06-16       | US 94560610 A      | 2010-11-12       | Functional layers of biomolecules and living cells, and a novel system to produce such                                                    | Patent Application |
| 8  | US           | 2011-06-16       | US 96077710 A      | 2010-12-06       | System and method for measuring analyte concentration with interferant correction                                                         | Patent Application |
| 9  | CA           | 2011-07-07       | CA 2786141 A       | 2010-12-23       | Transparent bacterial cellulose nanocomposite hydrogels                                                                                   | Patent Application |
| 10 | WO           | 2011-07-07       | CA 2010002040 W    | 2010-12-23       | Transparent bacterial cellulose nanocomposite hydrogels                                                                                   | Patent Application |
| 11 | WO           | 2011-07-28       | US 2011/0000123 W  | 2011-01-24       | Rapid pathogen detection techniques and apparatus                                                                                         | Patent Application |
| 12 | CN           | 2011-11-09       | CN 201010157076 A  | 2010-04-20       | Nucleic acid nano-gold biosensor based on bio-barcode                                                                                     | Patent Application |
| 13 | WO           | 2011-11-10       | US 2011/0035303 W  | 2011-05-05       | Water testing system                                                                                                                      | Patent Application |
| 14 | WO           | 2011-11-17       | CA 2011050294 W    | 2011-05-12       | Method of producing electrically conductive polymer and cellulose nanocomposites                                                          | Patent Application |
| 15 | WO           | 2012-01-05       | FI 2011050629 W    | 2011-07-04       | Functionalized films, sensory films, biosensors and methods for manufacturing them                                                        | Patent Application |
| 16 | WO           | 2012-01-19       | IE 2011000038 W    | 2011-07-15       | Silver electrode catalyst                                                                                                                 | Patent Application |
| 17 | EP           | 2012-02-22       | EP 10764694 A      | 2010-04-19       | Disease diagnosing biosensor capable of promptly separating blood cells                                                                   | Patent Application |
| 18 | WO           | 2012-03-15       | US 2011/0051193 W  | 2011-09-12       | Enzyme co-factor enhancement of biosensor performance                                                                                     | Patent Application |
| 19 | US           | 2012-03-15       | US 201113228947 A  | 2011-09-09       | Polyionic transitional metal phosphorescent complex/polymer hybrid systems for bioimaging and sensing applications                        | Patent Application |
| 20 | US           | 2012-04-12       | US 201113279509 A  | 2011-10-24       | Functionalized polymer biosensor                                                                                                          | Patent Application |
| 21 | US           | 2012-05-03       | US 201113317228 A  | 2011-10-12       | Food quality indicator                                                                                                                    | Patent Application |
| 22 | GB           | 2012-05-16       | GB 201019119 A     | 2010-11-12       | Porous fibre encapsulating biological material                                                                                            | Patent Application |
| 23 | KR           | 2012-05-18       | KR 20100111810 A   | 2010-11-10       | Disposable biosensors made with tin oxide - cellulose nanocomposite, manufacturing method of the same and measuring method using the same | Patent Application |
| 24 | WO           | 2012-05-24       | MY 2011000137 W    | 2011-06-23       | Composition of solvent casting solution comprising polypyrrole powder for use as a transducer in biochemical sensor applications          | Patent Application |
| 25 | WO           | 2012-05-31       | US 2011/0061956 W  | 2011-11-22       | Biosensing systems for measurement of lactose                                                                                             | Patent Application |
| 26 | WO           | 2012-06-07       | US 2011/0062951 W  | 2011-12-01       | Tissue implantable microbiosensor                                                                                                         | Patent Application |
| 27 | US           | 2012-06-14       | US 201013264699 A  | 2010-04-19       | Disease diagnosing biosensor capable of promptly separating blood cells                                                                   | Patent Application |
| 28 | CN           | 2012-06-20       | CN 201110365484 A  | 2011-11-17       | Electrode surface modification material, preparation method thereof and application thereof                                               | Patent Application |

|    |    |            |                   |            |                                                                                                                                                         |                    |
|----|----|------------|-------------------|------------|---------------------------------------------------------------------------------------------------------------------------------------------------------|--------------------|
| 29 | US | 2012-06-21 | US 201113171120 A | 2011-06-28 | Use and making of biosensors utilizing antimicrobial peptides for highly sensitive biological monitoring                                                | Patent Application |
| 30 | US | 2012-07-12 | US 201113270357 A | 2011-10-11 | Polymer matrices for cell culture                                                                                                                       | Patent Application |
| 31 | US | 2012-07-19 | US 201213433779 A | 2012-03-29 | Determination of blood glucose in a small volume and in a short test time using a chemical coating including binders and very short read potentials     | Patent Application |
| 32 | US | 2012-08-09 | US 201213451325 A | 2012-04-19 | Conjugate probes and optical detection of analytes                                                                                                      | Patent Application |
| 33 | WO | 2012-09-13 | IL 2012050080 W   | 2012-03-07 | Methods and devices for handling biofouling                                                                                                             | Patent Application |
| 34 | US | 2012-11-08 | US 201013505417 A | 2010-10-28 | Micro-channel structure method and apparatus                                                                                                            | Patent Application |
| 35 | US | 2012-11-08 | US 201113574296 A | 2011-01-24 | Rapid pathogen detection techniques and apparatus                                                                                                       | Patent Application |
| 36 | CN | 2012-11-28 | CN 201010157076 A | 2010-04-20 | Nucleic acid nano-gold biosensor based on bio-barcode                                                                                                   | Granted Patent     |
| 37 | US | 2013-01-08 | US 201213433779 A | 2012-03-29 | Determination of blood glucose in a small volume and in a short test time using a chemical coating including binders and very short read potentials     | Granted Patent     |
| 38 | US | 2013-01-10 | US 201013520076 A | 2010-12-23 | Transparent bacterial cellulose nanocomposite hydrogels                                                                                                 | Patent Application |
| 39 | CN | 2013-01-16 | CN 201210407536 A | 2012-10-24 | Method of using three-enzyme electrochemical biosensor for determining cellulase activity                                                               | Patent Application |
| 40 | WO | 2013-02-21 | US 2012/0050939 W | 2012-08-15 | Control of biofouling in implantable biosensors                                                                                                         | Patent Application |
| 41 | WO | 2013-03-07 | AU 2012/001038 W  | 2012-08-31 | Patterning method                                                                                                                                       | Patent Application |
| 42 | CN | 2013-03-20 | CN 201210513705 A | 2012-12-04 | Preparation method of hollow superparamagnetic nanospheres                                                                                              | Patent Application |
| 43 | US | 2013-04-04 | US 201213639264 A | 2012-09-25 | Composition of redox-reagents for electrochemical biosensor and biosensor comprising the same                                                           | Patent Application |
| 44 | WO | 2013-04-04 | KR 2012007711 W   | 2012-09-25 | Composition of redox-reagents for electrochemical biosensor and biosensor comprising the same                                                           | Patent Application |
| 45 | US | 2013-04-25 | US 201113277687 A | 2011-10-20 | Glucose biosensor with improved shelf life                                                                                                              | Patent Application |
| 46 | WO | 2013-04-25 | US 2012/0060928 W | 2012-10-19 | Glucose biosensor with improved shelf life                                                                                                              | Patent Application |
| 47 | US | 2013-05-16 | US 201113697698 A | 2011-05-12 | Method of producing electrically conductive polymer and cellulose nanocomposites                                                                        | Patent Application |
| 48 | US | 2013-05-23 | US 201113698734 A | 2011-04-19 | Enzyme-fiber matrix composite of three-dimensional network structure, preparation method thereof, and use thereof                                       | Patent Application |
| 49 | US | 2013-07-04 | US 201113821903 A | 2011-09-12 | Enzyme co-factor enhancement of biosensor performance                                                                                                   | Patent Application |
| 50 | US | 2013-08-22 | US 201213586436 A | 2012-08-15 | Control of biofouling in implantable biosensors                                                                                                         | Patent Application |
| 51 | US | 2013-09-19 | US 201113988723 A | 2011-11-22 | Biosensing systems for measurement of lactose                                                                                                           | Patent Application |
| 52 | WO | 2013-10-03 | GB 2013050754 W   | 2013-03-22 | Peridinin-chlorophyll binding proteins                                                                                                                  | Patent Application |
| 53 | WO | 2013-11-07 | SG 2013000175 W   | 2013-05-03 | A mediator-less electrochemical glucose sensing procedure employing the leach-proof covalent binding of an enzyme(s) to electrodes and products thereof | Patent Application |
| 54 | WO | 2013-11-07 | EP 2013058186 W   | 2013-04-19 | Diagnostic arrangement for determining an ageing condition of an electrical component                                                                   | Patent Application |
| 55 | US | 2013-11-14 | US 201313943753 A | 2013-07-16 | Method for fabricating biosensor                                                                                                                        | Patent Application |
| 56 | US | 2013-12-05 | US 201113991113 A | 2011-12-01 | Tissue implantable microbiosensor                                                                                                                       | Patent Application |
| 57 | WO | 2014-02-13 | US 2013/0040671 W | 2013-05-10 | Wearable electrochemical sensors                                                                                                                        | Patent Application |
| 58 | IE | 2014-03-26 | IE S20120145 A    | 2012-03-07 | Cellulose binding domain treated purified cotton fibers as textile biosensors                                                                           | Patent Application |
| 59 | WO | 2014-04-03 | US 2013/0062249 W | 2013-09-27 | Biosensor compositions and methods of their use                                                                                                         | Patent Application |
| 60 | WO | 2014-04-24 | US 2013/0065548 W | 2013-10-17 | Device and methods of using device for detection of aminoacidopathies                                                                                   | Patent Application |
| 61 | CN | 2014-05-07 | CN 201310749528 A | 2013-12-31 | Microbial film for biosensor and preparation method thereof                                                                                             | Patent Application |

|    |    |            |                   |            |                                                                                                                                                       |                    |
|----|----|------------|-------------------|------------|-------------------------------------------------------------------------------------------------------------------------------------------------------|--------------------|
| 62 | EP | 2014-08-13 | EP 14153774 A     | 2014-02-04 | Silver nanowire-containing composition, biosensor strip comprising the same and its preparation method                                                | Patent Application |
| 63 | US | 2014-08-14 | US 201414167158 A | 2014-01-29 | Silver nanowire-containing composition, biosensor strip comprising the same and its preparation method                                                | Patent Application |
| 64 | US | 2014-08-21 | US 201213562592 A | 2012-07-31 | Enzymatic biosensing systems                                                                                                                          | Patent Application |
| 65 | US | 2014-09-04 | US 201313783330 A | 2013-03-03 | Gold nanoparticle based dipstick nano-biosensor for detecting plasmodium falciparum and plasmodium vivax and method of synthesizing the same          | Patent Application |
| 66 | JP | 2014-10-06 | JP 2013064400 A   | 2013-03-26 | Crystal oscillator microbalance biosensor and method for manufacturing the same                                                                       | Patent Application |
| 67 | US | 2014-10-21 | US 201113270357 A | 2011-10-11 | Polymer matrices for cell culture                                                                                                                     | Granted Patent     |
| 68 | WO | 2014-10-23 | SG 2014000163 W   | 2014-04-14 | Electrochemical lateral flow bioassay and biosensor                                                                                                   | Patent Application |
| 69 | US | 2014-12-25 | US 201414483490 A | 2014-09-11 | Method for manufacturing biosensor                                                                                                                    | Patent Application |
| 70 | US | 2015-01-01 | US 201414307916 A | 2014-06-18 | Biomaterials having nanoscale layers and coatings                                                                                                     | Patent Application |
| 71 | CN | 2015-01-07 | CN 201410363321 A | 2014-07-28 | Graphene/nanometer cellulose composite fibers and preparation method thereof                                                                          | Patent Application |
| 72 | EP | 2015-01-07 | EP 14175390 A     | 2014-07-02 | Reagent composition for biosensor and biosensor having the same                                                                                       | Patent Application |
| 73 | US | 2015-01-08 | US 201414318161 A | 2014-06-27 | Reagent composition for biosensor and biosensor having the same                                                                                       | Patent Application |
| 74 | EP | 2015-01-21 | EP 13760769 A     | 2013-03-11 | Biosensor                                                                                                                                             | Patent Application |
| 75 | EP | 2015-01-21 | EP 13761636 A     | 2013-03-11 | Method for manufacturing biosensor                                                                                                                    | Patent Application |
| 76 | US | 2015-01-27 | US 201013520076 A | 2010-12-23 | Transparent bacterial cellulose nanocomposite hydrogels                                                                                               | Granted Patent     |
| 77 | US | 2015-01-29 | US 201414483456 A | 2014-09-11 | Biosensor                                                                                                                                             | Patent Application |
| 78 | US | 2015-02-05 | US 201414452141 A | 2014-08-05 | Method for the topographically-selective passivation of micro- and nanoscale devices                                                                  | Patent Application |
| 79 | KR | 2015-02-10 | KR 20100111810 A  | 2010-11-10 | Disposable biosensors made with Tin oxide - cellulose nanocomposite, manufacturing method of the same and measuring method using the same             | Granted Patent     |
| 80 | WO | 2015-03-05 | US 2014/0053756 W | 2014-09-02 | Device and methods of using device for detection of hyperammonemia                                                                                    | Patent Application |
| 81 | EP | 2015-03-11 | EP 13784803 A     | 2013-01-25 | Reagent composition for redox reaction                                                                                                                | Patent Application |
| 82 | WO | 2015-03-19 | EP 2014069233 W   | 2014-09-09 | Nanoparticles for use in bioadhesion                                                                                                                  | Patent Application |
| 83 | US | 2015-03-19 | US 201414554537 A | 2014-11-26 | Test Sensors and Methods of Using The Same                                                                                                            | Patent Application |
| 84 | EP | 2015-04-08 | EP 13306243 A     | 2013-09-10 | Use of nanoparticles for gluing gels                                                                                                                  | Patent Application |
| 85 | US | 2015-04-16 | US 201314398440 A | 2013-01-25 | Reagent composition for redox reaction                                                                                                                | Patent Application |
| 86 | CN | 2015-04-22 | CN 201410822047 A | 2014-12-25 | Preparation method of enzyme biosensor for peroxide value of edible oil                                                                               | Patent Application |
| 87 | US | 2015-05-07 | US 201314398669 A | 2013-05-03 | Mediator-less Electrochemical Glucose Sensing Procedure Employing the Leach-proof Covalent Binding of an Enzyme(s) to Electrodes and Products Thereof | Patent Application |
| 88 | US | 2015-05-07 | US 201314400242 A | 2013-05-10 | Wearable electrochemical sensors                                                                                                                      | Patent Application |
| 89 | US | 2015-05-12 | US 201113171120 A | 2011-06-28 | Use and making of biosensors utilizing antimicrobial peptides for highly sensitive biological monitoring                                              | Granted Patent     |
| 90 | WO | 2015-05-21 | US 2014/0065785 W | 2014-11-14 | Real-time satiety biofeedback                                                                                                                         | Patent Application |
| 91 | EP | 2015-06-03 | EP 13771551 A     | 2013-07-26 | Biosensor comprising metallic nanoparticles                                                                                                           | Patent Application |
| 92 | WO | 2015-06-04 | SG 2014000568 W   | 2014-11-28 | Novel ultrashort hydrophobic peptides that self-assemble into nanofibrous hydrogels and their uses                                                    | Patent Application |
| 93 | US | 2015-06-09 | US 201313943753 A | 2013-07-16 | Method for fabricating biosensor                                                                                                                      | Granted Patent     |
| 94 | WO | 2015-07-23 | CA 2014000027 W   | 2014-01-16 | Lateral flow assay apparatus and method, and sensor therefor                                                                                          | Patent Application |

|     |    |            |                   |            |                                                                                                                                                                                                                                                                                                                                                         |                    |
|-----|----|------------|-------------------|------------|---------------------------------------------------------------------------------------------------------------------------------------------------------------------------------------------------------------------------------------------------------------------------------------------------------------------------------------------------------|--------------------|
| 95  | WO | 2015-07-30 | US 2015/0012303 W | 2015-01-21 | Compositions for radiotherapy and uses thereof                                                                                                                                                                                                                                                                                                          | Patent Application |
| 96  | US | 2015-08-11 | US 201213586436 A | 2012-08-15 | Control of biofouling in implantable biosensors                                                                                                                                                                                                                                                                                                         | Granted Patent     |
| 97  | CN | 2015-09-02 | CN 201510224331 A | 2015-05-06 | Preparation method of ethyl cellulose nano micelle with UCST (upper critical solution temperature)                                                                                                                                                                                                                                                      | Patent Application |
| 98  | US | 2015-10-01 | US 201214353731 A | 2012-10-25 | Biofuel cell, method for production of biofuel cell, electronic device, enzyme immobilization electrode, method for production of enzyme immobilization electrode, electrode for production of enzyme immobilization electrode, method for 5 production of electrode for production of enzyme immobilization electrode and enzyme reaction using device | Patent Application |
| 99  | US | 2015-10-15 | US 201314417006 A | 2013-07-26 | Biosensor comprising metal nanoparticles                                                                                                                                                                                                                                                                                                                | Patent Application |
| 100 | CN | 2015-11-25 | CN 201510593230 A | 2015-09-17 | Environmental stress sensitive type immobilized enzyme porous micro-sphere carrier material and preparing method of porous micro-sphere carrier material                                                                                                                                                                                                | Patent Application |
| 101 | EP | 2016-02-03 | EP 12837571 A     | 2012-09-25 | Composition of redox-reagents for electrochemical biosensor and biosensor comprising the same                                                                                                                                                                                                                                                           | Granted Patent     |
| 102 | US | 2016-02-25 | US 201414784859 A | 2014-04-14 | Electrochemical lateral flow bioassay and biosensor                                                                                                                                                                                                                                                                                                     | Patent Application |
| 103 | WO | 2016-03-03 | IB 2014064038 W   | 2014-08-25 | Carbon nanotubes formulation and uses thereof                                                                                                                                                                                                                                                                                                           | Patent Application |
| 104 | WO | 2016-03-17 | IB 2015056832 W   | 2015-09-07 | Device and method for detection of haemoglobin and its complexes                                                                                                                                                                                                                                                                                        | Patent Application |
| 105 | WO | 2016-03-17 | IB 2015056854 W   | 2015-09-08 | Device and method for non-enzymatic and electrochemical detection of glucose bioanalyte                                                                                                                                                                                                                                                                 | Patent Application |
| 106 | US | 2016-03-24 | US 201514964721 A | 2015-12-10 | Electrochemical test sensor                                                                                                                                                                                                                                                                                                                             | Patent Application |
| 107 | WO | 2016-06-02 | US 2015/0062630 W | 2015-11-25 | Coated biosensor and method for preserving biosensor during implantation into the brain or other tissues                                                                                                                                                                                                                                                | Patent Application |
| 108 | CN | 2016-06-22 | CN 201610138700 A | 2016-03-12 | Preparation method of composite biosensor for water-quality toxicity prewarning during sewage treatment                                                                                                                                                                                                                                                 | Patent Application |
| 109 | US | 2016-07-28 | US 201615088067 A | 2016-03-31 | Reagent composition for biosensor and biosensor having the same                                                                                                                                                                                                                                                                                         | Patent Application |
| 110 | WO | 2016-07-28 | DK 2016050016 W   | 2016-01-20 | Substituted acridine-like and xanthenium-like fluorescent dyes                                                                                                                                                                                                                                                                                          | Patent Application |
| 111 | US | 2016-07-28 | US 201414917771 A | 2014-09-09 | Use of Nanoparticles For Gluing Gels                                                                                                                                                                                                                                                                                                                    | Patent Application |
| 112 | US | 2016-08-04 | US 201514708973 A | 2015-05-11 | Use and making of biosensors utilizing antimicrobial peptides for highly sensitive biological monitoring                                                                                                                                                                                                                                                | Patent Application |
| 113 | WO | 2016-08-11 | AU 2016/050069 W  | 2016-02-05 | Targeting constructs for delivery of payloads                                                                                                                                                                                                                                                                                                           | Patent Application |
| 114 | CN | 2016-09-07 | CN 201610229037 A | 2016-04-13 | Carbon quantum dot modified glucose oxidase enzyme membrane and preparation method thereof                                                                                                                                                                                                                                                              | Patent Application |
| 115 | US | 2016-09-08 | US 201615059570 A | 2016-03-03 | Bioplasmonic calligraphy for label-free biodetection                                                                                                                                                                                                                                                                                                    | Patent Application |
| 116 | US | 2016-10-04 | US 201514964721 A | 2015-12-10 | Electrochemical test sensor                                                                                                                                                                                                                                                                                                                             | Granted Patent     |
| 117 | WO | 2016-10-06 | US 2016/0025507 W | 2016-04-01 | Analyte sensing for eye injuries and conditions                                                                                                                                                                                                                                                                                                         | Patent Application |
| 118 | WO | 2016-10-06 | IB 2015056920 W   | 2015-09-10 | Solid state electrolyte biosensor                                                                                                                                                                                                                                                                                                                       | Patent Application |
| 119 | US | 2016-10-18 | US 201113991113 A | 2011-12-01 | Tissue implantable microbiosensor                                                                                                                                                                                                                                                                                                                       | Granted Patent     |
| 120 | US | 2016-10-27 | US 201415101007 A | 2014-01-16 | Lateral flow assay apparatus and method, and sensor therefor                                                                                                                                                                                                                                                                                            | Patent Application |
| 121 | WO | 2016-11-03 | US 2016/0029623 W | 2016-04-27 | Device and methods of using device for detection of hyperammonemia                                                                                                                                                                                                                                                                                      | Patent Application |
| 122 | US | 2016-11-15 | US 201213562592 A | 2012-07-31 | Enzymatic biosensing systems                                                                                                                                                                                                                                                                                                                            | Granted Patent     |
| 123 | US | 2016-11-17 | US 201515112589 A | 2015-01-21 | Compositions for radiotherapy and uses thereof                                                                                                                                                                                                                                                                                                          | Patent Application |
| 124 | US | 2016-11-17 | US 201615152208 A | 2016-05-11 | Needle for biosensor and bio sensor including the same                                                                                                                                                                                                                                                                                                  | Patent Application |

|     |    |            |                   |            |                                                                                                                                 |                    |
|-----|----|------------|-------------------|------------|---------------------------------------------------------------------------------------------------------------------------------|--------------------|
| 125 | WO | 2016-11-17 | KR 2016004944 W   | 2016-05-11 | Needle for biosensor and bio sensor including the same                                                                          | Patent Application |
| 126 | CN | 2016-11-30 | CN 201610519084 A | 2016-07-04 | Interpenetration type petal-structured simulated nacre environmental-friendly composite membrane and preparation method thereof | Patent Application |
| 127 | US | 2016-12-08 | US 201615244212 A | 2016-08-23 | Biosensor System Having Enhanced Stability and Hematocrit Performance                                                           | Patent Application |
| 128 | WO | 2016-12-08 | US 2016/0035336 W | 2016-06-01 | Miniaturized electronic systems with wireless power and near-field communication capabilities                                   | Patent Application |
| 129 | US | 2017-02-16 | US 201615160150 A | 2016-05-20 | Polymer coating comprising 2-methoxyethyl acrylate units synthesized by surface-initiated atom transfer radical polymerization  | Patent Application |
| 130 | US | 2017-03-23 | US 201515126511 A | 2015-03-24 | A therapeutic agent for use in the treatment of infections                                                                      | Patent Application |
| 131 | WO | 2017-04-13 | US 2016/0055706 W | 2016-10-06 | A biosensor device to detect target analytes in situ, in vivo, and/or in real time, and methods of making and using the same    | Patent Application |
| 132 | EP | 2017-04-26 | EP 13771551 A     | 2013-07-26 | Biosensor comprising metallic nanoparticles                                                                                     | Granted Patent     |
| 133 | WO | 2017-05-26 | US 2016/0062963 W | 2016-11-19 | Bicarbonate biosensors, calcium biosensors, and uses thereof                                                                    | Patent Application |
| 134 | WO | 2017-05-26 | US 2016/0062961 W | 2016-11-19 | Lactate biosensors and uses thereof                                                                                             | Patent Application |
| 135 | WO | 2017-05-26 | US 2016/0062958 W | 2016-11-19 | Ratiometric biosensors and non-geometrically modulated fret                                                                     | Patent Application |
| 136 | WO | 2017-05-26 | US 2016/0062962 W | 2016-11-19 | Thermostable glucose biosensors and uses thereof                                                                                | Patent Application |
| 137 | WO | 2017-05-26 | US 2016/0062960 W | 2016-11-19 | Urea biosensors and uses thereof                                                                                                | Patent Application |
| 138 | EP | 2017-07-12 | EP 12823633 A     | 2012-08-15 | Control of biofouling in implantable biosensors                                                                                 | Granted Patent     |
| 139 | WO | 2017-07-27 | GB 2017050147 W   | 2017-01-20 | Alternative electrochemical biosensor                                                                                           | Patent Application |
| 140 | WO | 2017-07-27 | GB 2017050146 W   | 2017-01-20 | Electronic biosensor                                                                                                            | Patent Application |
| 141 | US | 2017-08-24 | US 201515509447 A | 2015-09-07 | Device and method for detection of haemoglobin and its complexes                                                                | Patent Application |
| 142 | WO | 2017-08-24 | SE 2017050147 W   | 2017-02-15 | Diagnostic device and related method                                                                                            | Patent Application |
| 143 | EP | 2017-09-06 | EP 14175390 A     | 2014-07-02 | Reagent composition for biosensor and biosensor having the same                                                                 | Granted Patent     |
| 144 | US | 2017-09-14 | US 201515529625 A | 2015-11-25 | Coated Biosensor and Method for Preserving Biosensor During Implantation into the Brain or Other Tissues                        | Patent Application |
| 145 | JP | 2017-10-05 | JP 2016070881 A   | 2016-03-31 | Conductive laminate                                                                                                             | Patent Application |
| 146 | CN | 2017-10-10 | CN 201710329483 A | 2017-05-11 | Glucose oxidase screen-printed electrode for online detection and preparation method thereof                                    | Patent Application |
| 147 | EP | 2017-11-08 | EP 16000989 A     | 2016-05-02 | A method for light-induced actuation of ph-sensitive assemblies and a composite material therefore                              | Patent Application |
| 148 | EP | 2017-11-08 | EP 15875765 A     | 2015-12-31 | Electrochemical biosensor                                                                                                       | Patent Application |
| 149 | US | 2017-11-21 | US 201314400242 A | 2013-05-10 | Wearable electrochemical sensors                                                                                                | Granted Patent     |
| 150 | WO | 2017-11-23 | US 2017/0033579 W | 2017-05-19 | Methods of making gels and film using curli nanofibers                                                                          | Patent Application |
| 151 | WO | 2017-11-23 | US 2017/0032923 W | 2017-05-16 | Scalable production of genetically engineered nanofibrous macroscopic materials via filtration                                  | Patent Application |
| 152 | US | 2017-12-07 | US 201515533333 A | 2015-12-31 | Electrochemical biosensor                                                                                                       | Patent Application |
| 153 | EP | 2018-01-24 | EP 17185090 A     | 2014-07-02 | Reagent composition for biosensor and biosensor having the same                                                                 | Patent Application |
| 154 | CN | 2018-01-26 | CN 201710822678 A | 2017-09-13 | Composite fluorescent biosensor, and preparation method and application thereof                                                 | Patent Application |
| 155 | US | 2018-03-13 | US 201515126511 A | 2015-03-24 | Therapeutic agent for use in the treatment of infections                                                                        | Granted Patent     |
| 156 | WO | 2018-04-05 | SG 2017050481 W   | 2017-09-27 | Elastic bioresorbable encasement for implants                                                                                   | Patent Application |
| 157 | US | 2018-04-10 | US 201615088067 A | 2016-03-31 | Reagent composition for biosensor and biosensor having the same                                                                 | Granted Patent     |
| 158 | US | 2018-04-19 | US 201615562647 A | 2016-04-01 | Analyte Sensing for Eye Injuries and Conditions                                                                                 | Patent Application |

|     |    |            |                   |            |                                                                                                                              |                    |
|-----|----|------------|-------------------|------------|------------------------------------------------------------------------------------------------------------------------------|--------------------|
| 159 | CN | 2018-05-04 | CN 201711190156 A | 2017-11-24 | BOD (Biochemical Oxygen Demand) biosensor as well as preparation method and application thereof                              | Patent Application |
| 160 | US | 2018-05-22 | US 201414784859 A | 2014-04-14 | Electrochemical lateral flow bioassay and biosensor                                                                          | Granted Patent     |
| 161 | US | 2018-05-24 | US 201615570269 A | 2016-04-27 | Device and methods of using device for detection of hyperammonemia                                                           | Patent Application |
| 162 | US | 2018-06-14 | US 201615577807 A | 2016-06-06 | Biosensor chip and biosensor device                                                                                          | Patent Application |
| 163 | US | 2018-06-14 | US 201615578602 A | 2016-06-01 | Miniaturized electronic systems with wireless power and near-field communication capabilities                                | Patent Application |
| 164 | US | 2018-06-19 | US 201213639264 A | 2012-09-25 | Composition of redox-reagents for electrochemical biosensor and biosensor comprising the same                                | Granted Patent     |
| 165 | US | 2018-07-17 | US 201113988723 A | 2011-11-22 | Biosensing systems for measurement of lactose                                                                                | Granted Patent     |
| 166 | EP | 2018-08-08 | EP 14786108 A     | 2014-04-14 | Electrochemical lateral flow bioassay and biosensor                                                                          | Granted Patent     |
| 167 | US | 2018-08-16 | US 201715492581 A | 2017-04-20 | Biosensor test strip and its etchant-free fabrication method                                                                 | Patent Application |
| 168 | EP | 2018-08-29 | EP 13784803 A     | 2013-01-25 | Reagent composition for redox reaction                                                                                       | Granted Patent     |
| 169 | CN | 2018-09-04 | CN 201810214019 A | 2018-03-15 | Optically-active cellulose nanocrystal/conjugate conductive polymer composite film preparation method                        | Patent Application |
| 170 | US | 2018-09-06 | US 201815964217 A | 2018-04-27 | Analyte sensors and methods of using same                                                                                    | Patent Application |
| 171 | US | 2018-09-27 | US 201615764627 A | 2016-10-06 | A biosensor device to detect target analytes in situ, in vivo, and/or in real time, and methods of making and using the same | Patent Application |
| 172 | WO | 2018-11-01 | US 2017/0029176 W | 2017-04-24 | Method for detecting presence of a thioether and kit for detecting same                                                      | Patent Application |
| 173 | CN | 2018-11-06 | CN 201810673840 A | 2018-06-27 | Composite hollow microsphere material for biosensor and preparation method thereof                                           | Patent Application |
| 174 | US | 2018-11-13 | US 201314398440 A | 2013-01-25 | Reagent composition for redox reaction                                                                                       | Granted Patent     |
| 175 | CN | 2018-12-04 | CN 201810917016 A | 2018-08-13 | Method for constructing nanocellulose paper-based biosensor                                                                  | Patent Application |
| 176 | WO | 2018-12-13 | US 2018/0036048 W | 2018-06-05 | Electrochemical biosensors                                                                                                   | Patent Application |
| 177 | CN | 2018-12-14 | CN 201810516705 A | 2018-05-25 | Preparation method and test method of GOP/CNF composite material with water-induced deformation memory function              | Patent Application |
| 178 | US | 2019-01-03 | US 201816025608 A | 2018-07-02 | Method and electronic device for determining the concentration of an analyte                                                 | Patent Application |
| 179 | WO | 2019-01-03 | US 2018/0040448 W | 2018-06-29 | N-oxide and ectoine monomers, polymers, their compositions, and related methods                                              | Patent Application |
| 180 | EP | 2019-01-09 | EP 18180351 A     | 2018-06-28 | Method and electronic device for determining the concentration of an analyte                                                 | Patent Application |
| 181 | WO | 2019-01-17 | JP 2018025579 W   | 2018-07-05 | Composite composition, method for producing same and biosensor                                                               | Patent Application |
| 182 | WO | 2019-01-31 | US 2018/0044428 W | 2018-07-30 | In situ sensing of water potential                                                                                           | Patent Application |
| 183 | US | 2019-02-07 | US 201816050460 A | 2018-07-31 | Digital biosensor                                                                                                            | Patent Application |
| 184 | US | 2019-02-07 | US 201816057314 A | 2018-08-07 | Nanoparticle sensor having a nanofibrous membrane scaffold                                                                   | Patent Application |
| 185 | US | 2019-02-14 | US 201716076672 A | 2017-02-15 | Diagnostic device and related method                                                                                         | Patent Application |
| 186 | US | 2019-02-21 | US 201715692353 A | 2017-08-31 | Method for making paper-based biosensor pattern                                                                              | Patent Application |
| 187 | US | 2019-02-26 | US 201414452141 A | 2014-08-05 | Method for the topographically-selective passivation of micro- and nanoscale devices                                         | Granted Patent     |
| 188 | US | 2019-03-07 | US 201816121405 A | 2018-09-04 | Medical device with integrated biosensor                                                                                     | Patent Application |
| 189 | WO | 2019-03-07 | US 2018/0049377 W | 2018-09-04 | Medical device with integrated biosensor                                                                                     | Patent Application |
| 190 | WO | 2019-03-21 | US 2018/0051600 W | 2018-09-18 | Nanocellulose and nanocellulose composite arrays and devices and methods of making and using the same                        | Patent Application |
| 191 | US | 2019-04-16 | US 201615244212 A | 2016-08-23 | Electrochemical test sensor                                                                                                  | Granted Patent     |

|     |    |            |                   |            |                                                                                                                                                 |                    |
|-----|----|------------|-------------------|------------|-------------------------------------------------------------------------------------------------------------------------------------------------|--------------------|
| 192 | US | 2019-05-02 | US 201716302687 A | 2017-05-19 | Methods of making gels and films using curli nanofibers                                                                                         | Patent Application |
| 193 | WO | 2019-05-16 | SE 2018051117 W   | 2018-11-01 | Novel biosensor and related wound dressing system                                                                                               | Patent Application |
| 194 | CN | 2019-05-17 | CN 201910064344 A | 2019-01-23 | Fluorescent oxidized nanocellulose thin film with adjustable light color and preparation method of fluorescent oxidized nanocellulose thin film | Patent Application |
| 195 | CN | 2019-06-07 | CN 201910201109 A | 2019-03-18 | Modification material for preparing working electrode of biosensor                                                                              | Patent Application |
| 196 | RU | 2019-06-11 | RU 2016118529 A   | 2014-11-20 | Obtaining graphene oxide                                                                                                                        | Granted Patent     |
| 197 | US | 2019-07-11 | US 201916244084 A | 2019-01-09 | Bioactive nanoparticles and methods for making same                                                                                             | Patent Application |
| 198 | US | 2019-08-15 | US 201916393601 A | 2019-04-24 | Test sensors and methods of using the same                                                                                                      | Patent Application |
| 199 | US | 2019-08-22 | US 201816221384 A | 2018-12-14 | Polar fluid gated field effect devices                                                                                                          | Patent Application |
| 200 | US | 2019-08-27 | US 201615152208 A | 2016-05-11 | Needle for biosensor and bio sensor including the same                                                                                          | Granted Patent     |
| 201 | US | 2019-09-03 | US 201615562647 A | 2016-04-01 | Analyte sensing for eye injuries and conditions                                                                                                 | Granted Patent     |
| 202 | WO | 2019-09-12 | JP 2019005529 W   | 2019-02-15 | Device provided with composite immobilized on support, and biosensor                                                                            | Patent Application |
| 203 | US | 2019-10-17 | US 201716302315 A | 2017-05-16 | Scalable production of genetically engineered nanofibrous macroscopic materials via filtration                                                  | Patent Application |
| 204 | EP | 2019-11-27 | EP 17185090 A     | 2014-07-02 | Reagent composition for biosensor and biosensor having the same                                                                                 | Granted Patent     |
| 205 | US | 2019-12-05 | US 201815991254 A | 2018-05-29 | Biosensor package                                                                                                                               | Patent Application |
| 206 | WO | 2019-12-05 | IB 2019054165 W   | 2019-05-21 | Biosensor package                                                                                                                               | Patent Application |
| 207 | US | 2019-12-26 | US 201916449140 A | 2019-06-21 | Transdermal biosensor                                                                                                                           | Patent Application |
| 208 | US | 2020-01-09 | US 201716337836 A | 2017-09-27 | Elastic bioresorbable encasement for implants                                                                                                   | Patent Application |
| 209 | WO | 2020-01-30 | US 2019/0043601 W | 2019-07-26 | Oligomerized protein-polymer conjugates                                                                                                         | Patent Application |
| 210 | CN | 2020-01-31 | CN 201810802557 A | 2018-07-20 | Bacterial cellulose/emu oil composite membrane and preparation method thereof                                                                   | Patent Application |
| 211 | WO | 2020-02-06 | US 2019/0044107 W | 2019-07-30 | Biomimetic rebuilding of multifunctional red blood cells                                                                                        | Patent Application |
| 212 | WO | 2020-02-20 | US 2019/0046923 W | 2019-08-16 | Composite matrix for analyte biosensors                                                                                                         | Patent Application |
| 213 | US | 2020-02-20 | US 201716608153 A | 2017-04-24 | Method for detecting presence of a thioether and kit for detecting same                                                                         | Patent Application |
| 214 | US | 2020-02-20 | US 201916523209 A | 2019-07-26 | Oligomerized protein-polymer conjugates                                                                                                         | Patent Application |
| 215 | WO | 2020-02-27 | EP 2019072574 W   | 2019-08-23 | Biosensor for male infertility                                                                                                                  | Patent Application |
| 216 | WO | 2020-02-27 | GB 2019052361 W   | 2019-08-22 | Nucleic acid based detection methods                                                                                                            | Patent Application |
| 217 | US | 2020-03-05 | US 201916548405 A | 2019-08-22 | Method of producing nanoparticle device using print-on hydrogel                                                                                 | Patent Application |
| 218 | US | 2020-03-17 | US 201615570269 A | 2016-04-27 | Device and methods of using device for detection of hyperammonemia                                                                              | Granted Patent     |
| 219 | EP | 2020-04-01 | EP 15875765 A     | 2015-12-31 | Electrochemical biosensor                                                                                                                       | Granted Patent     |
| 220 | US | 2020-04-09 | US 201816153501 A | 2018-10-05 | Bio-ink structures and methods of producing the same                                                                                            | Patent Application |
| 221 | CN | 2020-04-10 | CN 201911260934 A | 2019-12-10 | Paper-based microfluid chip, and preparation method and application thereof                                                                     | Patent Application |
| 222 | US | 2020-04-23 | US 201816627068 A | 2018-06-29 | N-oxide and ectoine monomers, polymers, their compositions, and related methods                                                                 | Patent Application |
| 223 | US | 2020-04-30 | US 201916666696 A | 2019-10-29 | Parylene-a-coated insoluble porous membrane-based portable urea biosensor for use in flow conditions                                            | Patent Application |
| 224 | US | 2020-06-25 | US 201816613151 A | 2018-06-05 | Electrochemical biosensors                                                                                                                      | Patent Application |
| 225 | US | 2020-07-14 | US 201816121405 A | 2018-09-04 | Medical device with integrated biosensor                                                                                                        | Granted Patent     |
| 226 | US | 2020-07-23 | US 201816647110 A | 2018-09-18 | Nanocellulose and nanocellulose composite arrays and devices and methods of making and using the same                                           | Patent Application |
| 227 | EP | 2020-08-12 | EP 18180351 A     | 2018-06-28 | Method and electronic device for determining the concentration of an analyte                                                                    | Granted Patent     |
| 228 | WO | 2020-08-20 | US 2020/0018511 W | 2020-02-17 | Vascularizing devices and methods for implanted diagnostics and therapeutics                                                                    | Patent Application |

|     |    |            |                   |            |                                                                                                                       |                    |
|-----|----|------------|-------------------|------------|-----------------------------------------------------------------------------------------------------------------------|--------------------|
| 229 | CN | 2020-09-04 | CN 202010556631 A | 2020-06-18 | Detection formula of uric acid biosensor                                                                              | Patent Application |
| 230 | US | 2020-10-08 | US 201916429922 A | 2019-06-03 | Multi-enzymatic biosensors and stabilization of multi-enzymatic biosensors at room temperature                        | Patent Application |
| 231 | WO | 2020-10-08 | US 2019/0035156 W | 2019-06-03 | Multi-enzymatic biosensors and stabilization of multi-enzymatic biosensors at room temperature                        | Patent Application |
| 232 | US | 2020-10-08 | US 201916430028 A | 2019-06-03 | Urea biosensors and stabilization of urea biosensors at room temperature                                              | Patent Application |
| 233 | WO | 2020-10-08 | US 2019/0035153 W | 2019-06-03 | Urea biosensors and stabilization of urea biosensors at room temperature                                              | Patent Application |
| 234 | US | 2020-10-15 | US 201816759771 A | 2018-11-01 | Novel biosensor and related wound dressing system                                                                     | Patent Application |
| 235 | EP | 2020-10-28 | EP 17753580 A     | 2017-02-15 | Diagnostic device and related method                                                                                  | Granted Patent     |
| 236 | CN | 2020-10-30 | CN 202010675959 A | 2020-07-14 | Flexible epidermal electrochemical biosensor based on conductive hydrogel                                             | Patent Application |
| 237 | US | 2020-11-19 | US 201916411200 A | 2019-05-14 | Method of fabricating patterned cellulose nanocrystal composite nanofibers and nano thin films and their applications | Patent Application |
| 238 | WO | 2020-12-03 | US 2020/0034390 W | 2020-05-22 | Sensors and methods for rapid microbial detection                                                                     | Patent Application |
| 239 | WO | 2020-12-10 | CA 2020050766 W   | 2020-06-03 | Omniphobic surfaces with hierarchical structures, and methods of making and uses thereof                              | Patent Application |
| 240 | US | 2020-12-29 | US 201715588330 A | 2017-05-05 | Tunable nano-structured inkjet printed graphene via UV pulsed-laser irradiation for electrochemical sensing           | Granted Patent     |
| 241 | EP | 2020-12-30 | EP 15714598 A     | 2015-03-24 | A therapeutic agent for use in the treatment of infections                                                            | Granted Patent     |
